# Supplementary material for: The Real maccoyii: Identifying Tuna Sushi with DNA Barcodes – Contrasting Characteristic Attributes and Genetic Distances
Source: PubMed Central journal article supplement (PMC2773415; doi:10.1371/journal.pone.0007866), 2009-11-18

# BOLD TaxonID Tree

Project : BOLD Search[NO CODE]  
Date : 26-December-2008  
Data Type : Nucleotide  
Distance Model : Kimura 2 Parameter  
Codon Positions : 1st, 2nd, 3rd  
Labels : SampleID, Sequence Length,  
Colorization :

Sequence Count : 51  
Species count : 8  
Genus count : 1  
Family count : 1  
Unidentified : 0

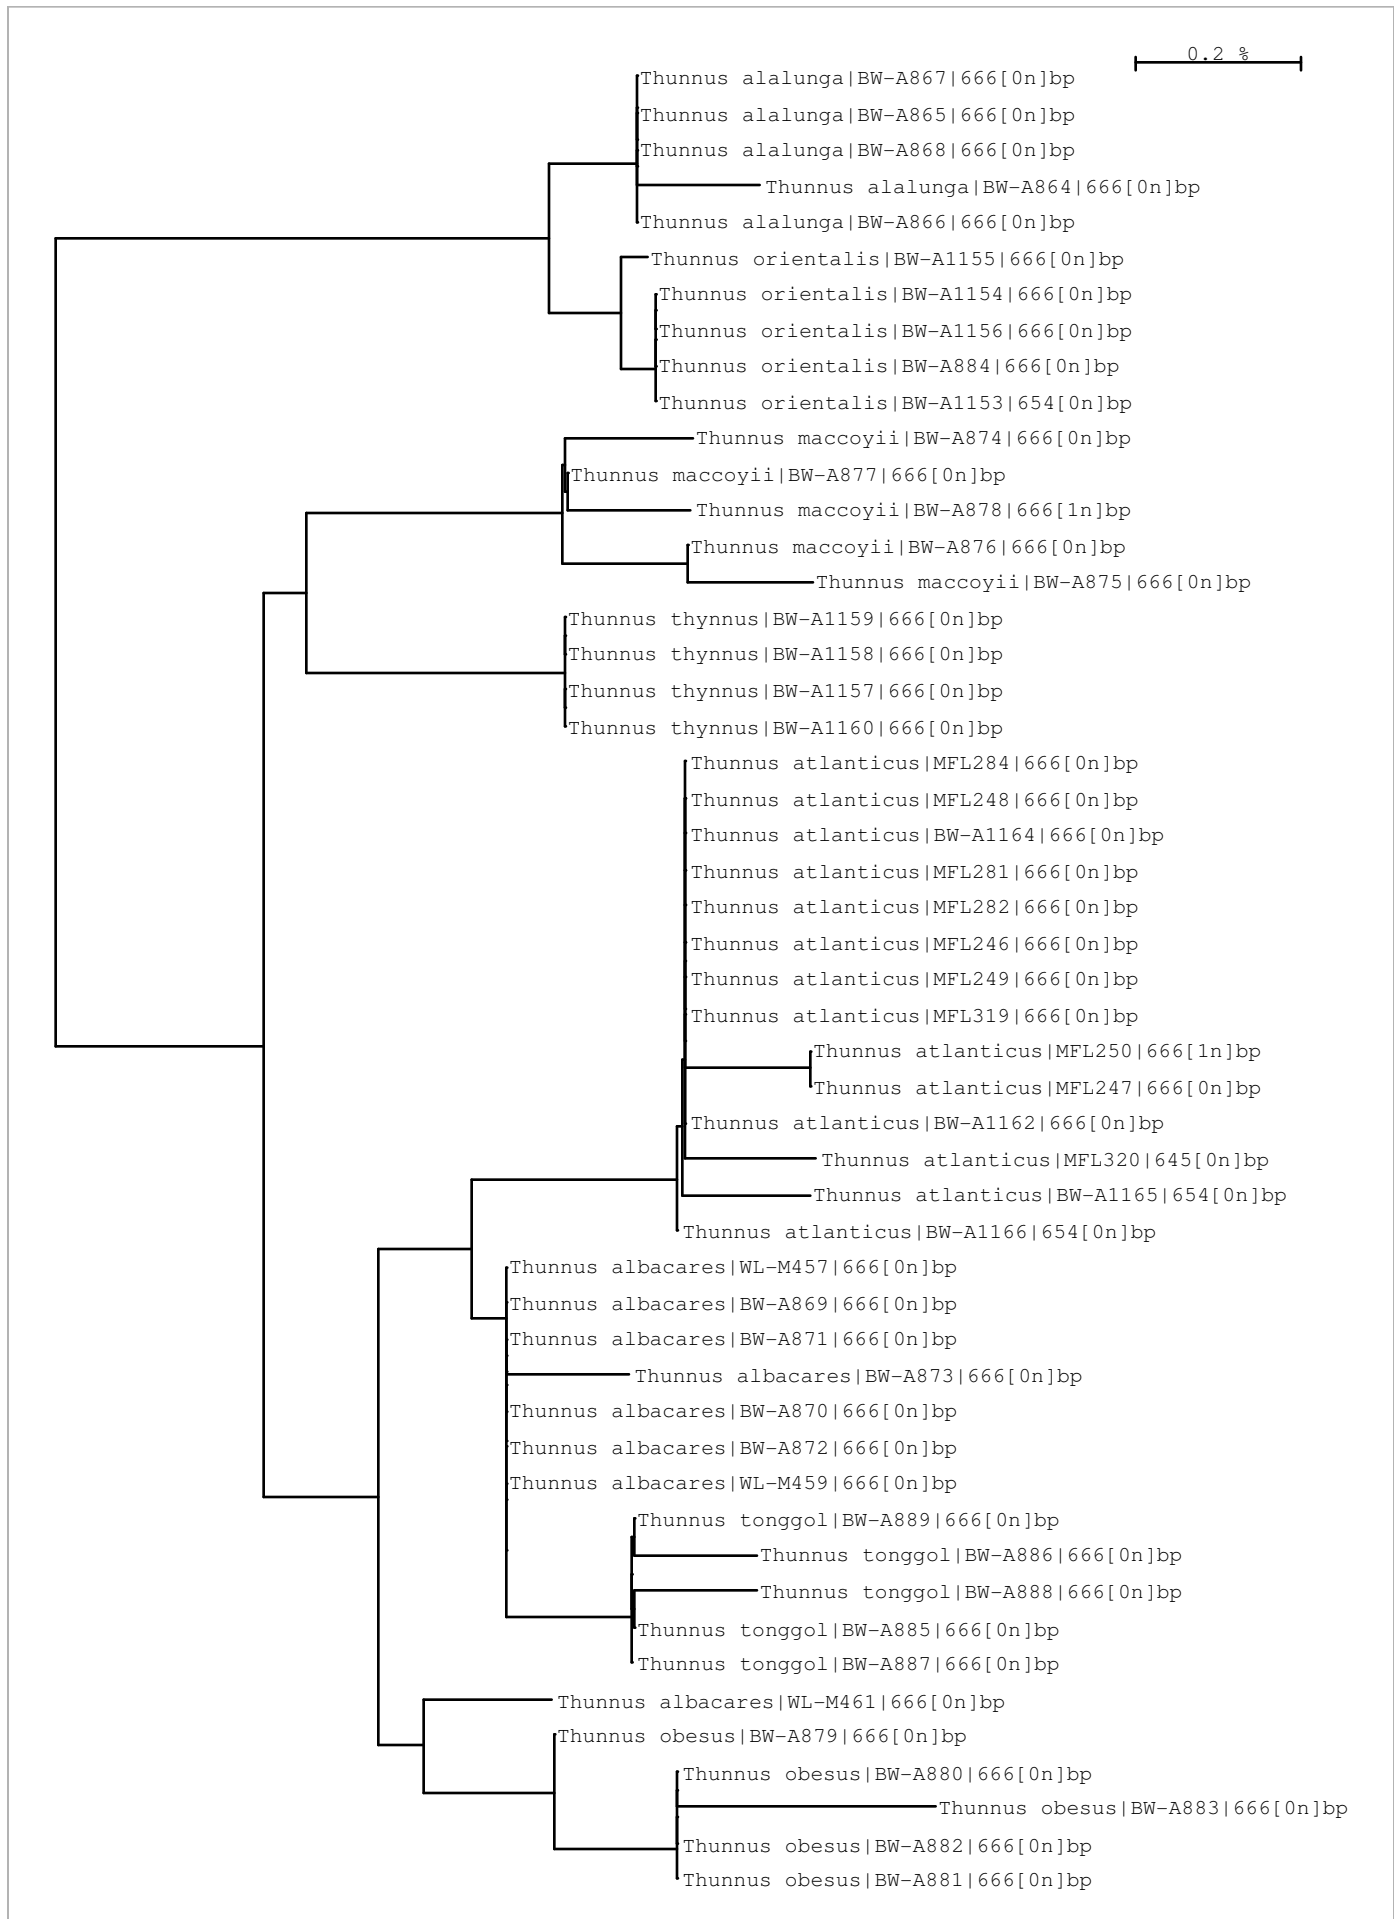

Supplement: pone.0007866.s003.pdf [file pone.0007866.s003.pdf]
